# Supplementary material for: Protein Composition and Baking Quality of Wheat Flour as Affected by Split Nitrogen Application
Source: PubMed Central journal article supplement (PMC6530357; doi:10.3389/fpls.2019.00642), 2019-05-15
Supplement: Image_1.pdf [file Image_1.pdf]

**Supplementary Figure S1** 2-DE gel images of Tobak and JB Asano.

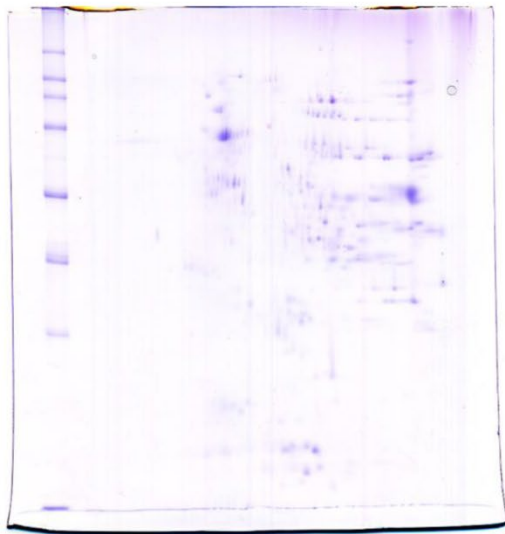

**Tobak-Early N treatment-  
Replicate 1**

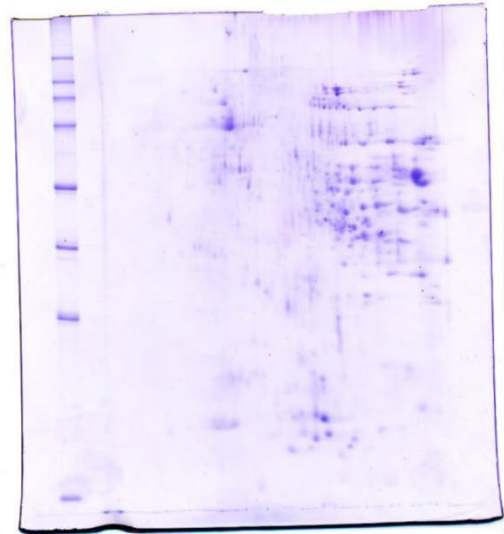

**Tobak-Split N treatment-  
Replicate 1**

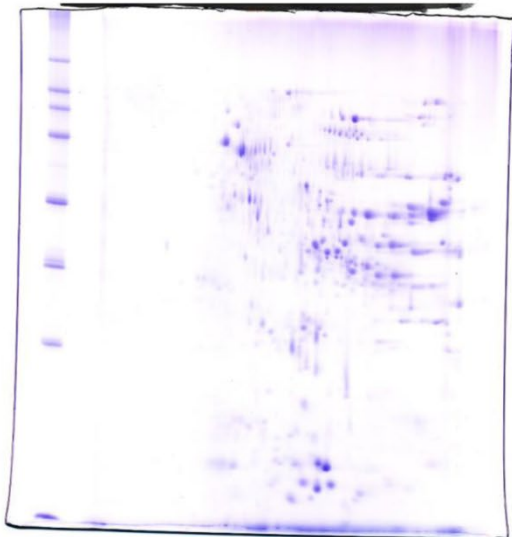

**JB Asano-Early N treatment-  
Replicate 1**

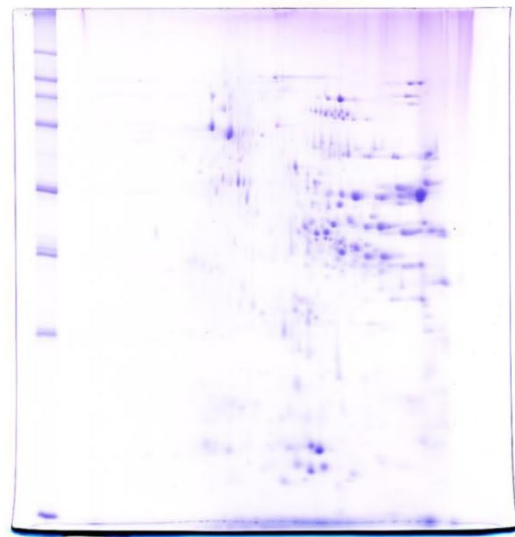

**JB Asano-Split N treatment-  
Replicate 1**

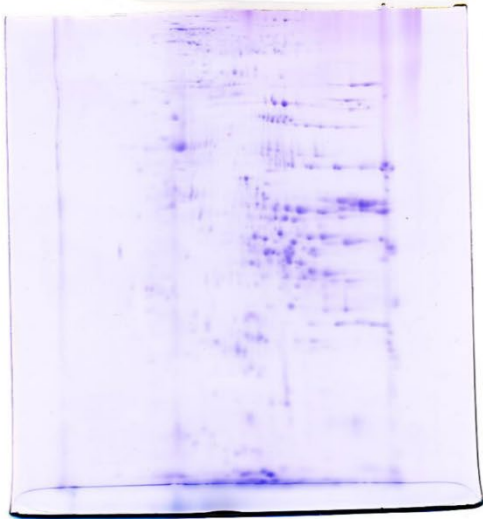

**Tobak-Early N treatment-  
Replicate 2**

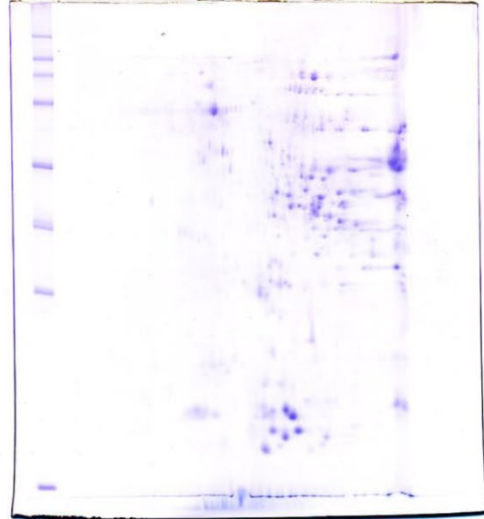

**Tobak-Split N treatment-  
Replicate 2**

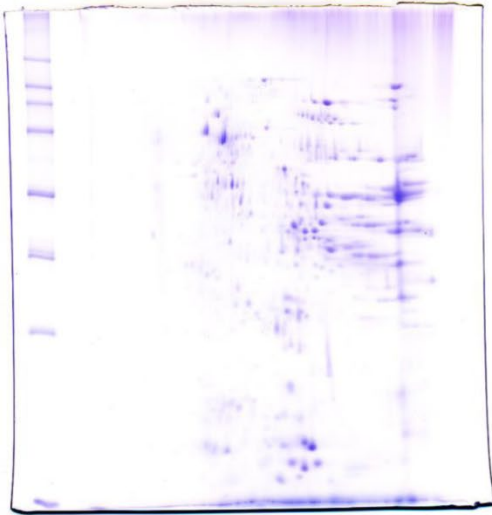

**JB Asano-Early N treatment-  
Replicate 2**

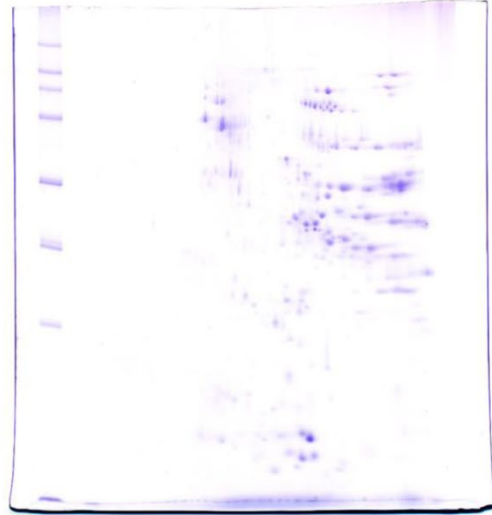

**JB Asano-Split N treatment-  
Replicate 2**

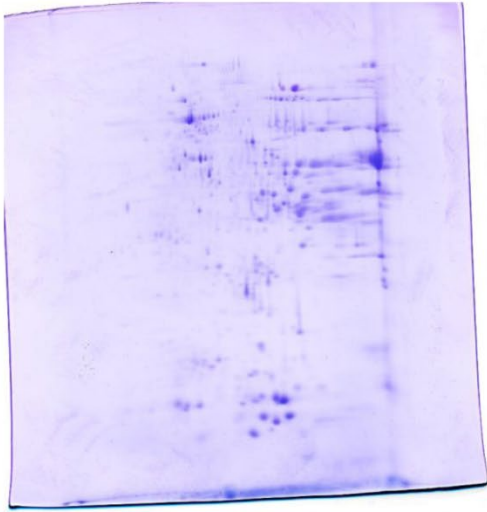

**Tobak-Early N treatment-**  
Replicate 3

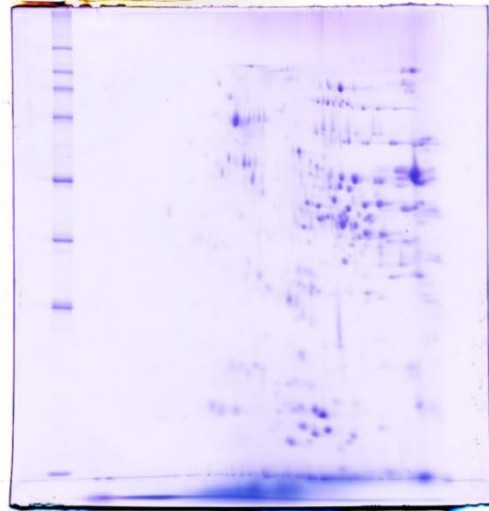

**Tobak-Split N treatment-**  
Replicate 3

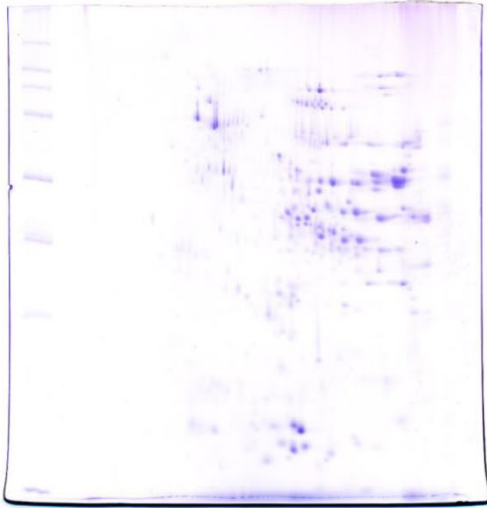

**JB Asano-Early N treatment-**  
Replicate 3

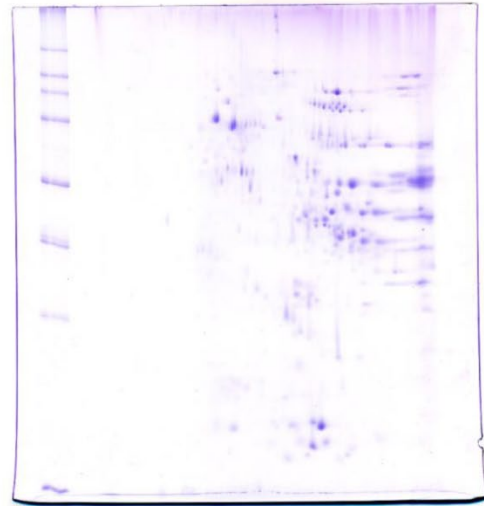

**JB Asano-Split N treatment-**  
Replicate 3

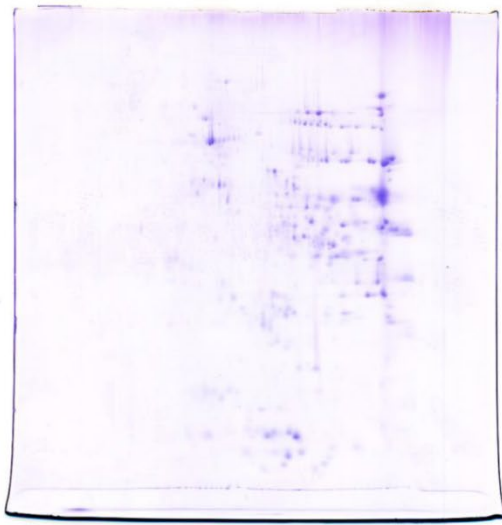

**Tobak**-Early N treatment-  
Replicate 4

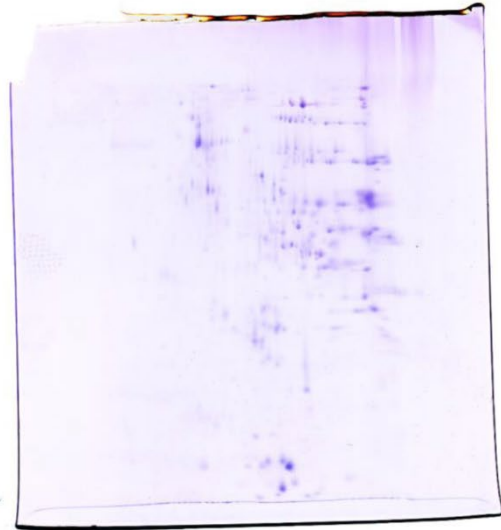

**Tobak**-Split N treatment-  
Replicate 4

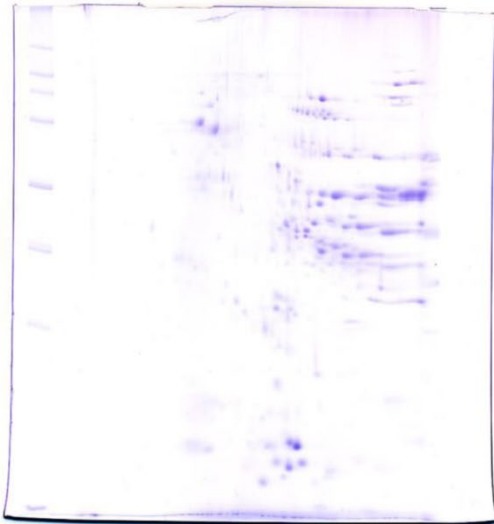

**JB Asano**-Early N treatment-  
Replicate 4

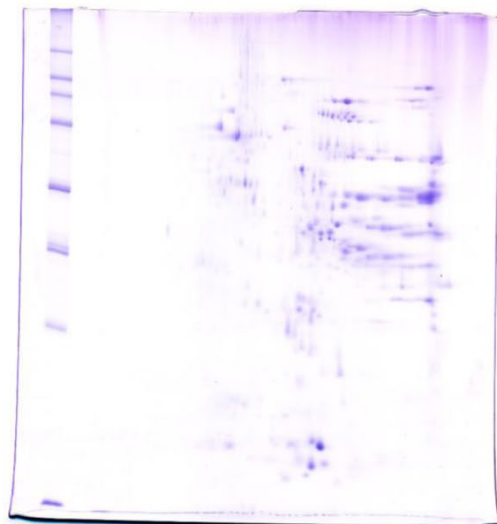

**JB Asano**-Split N treatment-  
Replicate 4

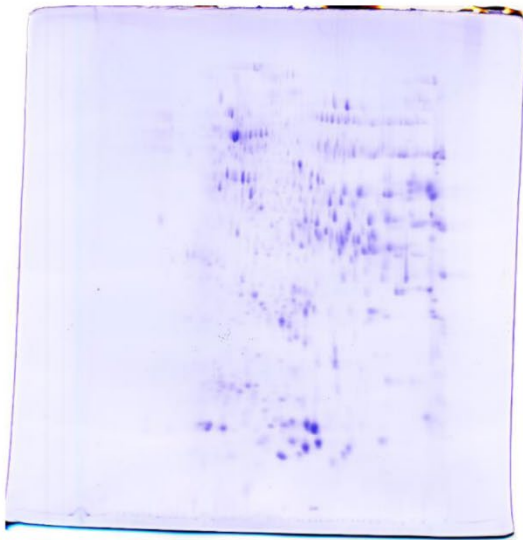

**Tobak-Early N treatment-  
Replicate 5**

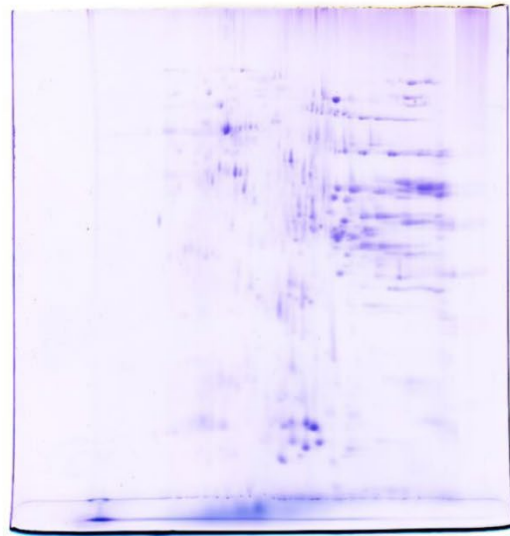

**Tobak-Split N treatment-  
Replicate 5**

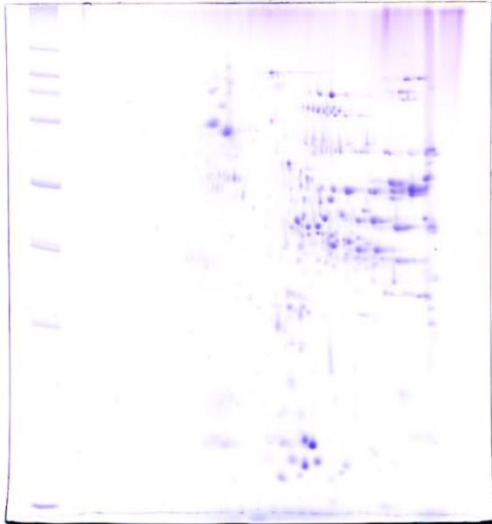

**JB Asano-Early N treatment-  
Replicate 5**

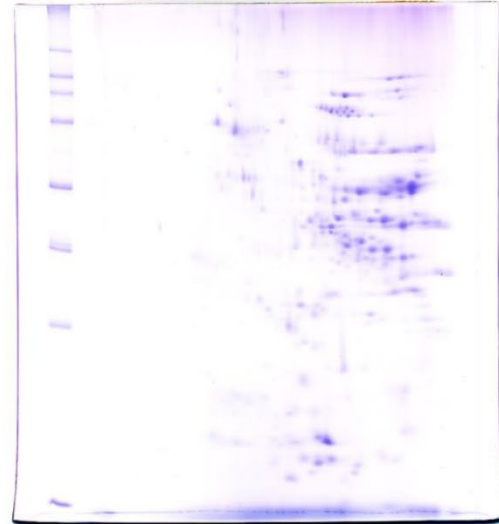

**JB Asano-Split N treatment-  
Replicate 5**
